# Supplementary material for: Un libro sobre Carlos de Windsor.
Source: Royal Society of Chemistry journal article supplement (doi:10.1039/d1cp01498f), 2012-01-01
Supplement: d1cp01498f1.pdf [file d1cp01498f1.pdf]

## Supplementary Information

### **Silver oxide model surface improves computational simulation of surface-enhanced Raman spectroscopy on silver nanoparticles**

Scott G. Harroun,<sup>\*a</sup> Yaoting Zhang,<sup>b</sup> Tzu-Heng Chen,<sup>c,d</sup>

Huan-Tsung Chang,<sup>\*c</sup> and Alexis Vallée-Bélisle<sup>\*ac</sup>

*a. Laboratory of Biosensors & Nanomachines, Département de chimie, Université de Montréal, Montréal, QC, H3C 3J7, Canada*

*b. Department of Chemistry, Queen's University, Kingston, ON, K7L 3N6, Canada*

*c. Department of Chemistry, National Taiwan University, Taipei, 10617, Taiwan*

*d. Laboratory of Nanoscale Biology, Institute of Bioengineering, School of Engineering, École Polytechnique Fédérale de Lausanne (EPFL), 1015 Lausanne, Switzerland*

*e. Département de biochimie et médecine moléculaire, Université de Montréal, Montréal, QC, H3C 3J7, Canada*

## MATERIALS AND METHODS

*Chemical Reagents and Instrumentation.* 2,6-Diaminopurine (98%), silver nitrate (99.8%), sodium citrate tribasic dihydrate (99.5%) (Sigma-Aldrich, St. Louis, MO, USA) and potassium chloride (Janssen, Beerse, Belgium) were used in this study. All solutions were prepared in ultrapure water from a Milli-Q system (EMD Millipore, Billerica, MA, USA) with 18.2 M $\Omega$ ·cm resistivity. Raman spectra were recorded with a Nicolet Almega XR Dispersive Raman spectrometer (Thermo Fisher Scientific, Waltham, MA, USA). Spectra were recorded for 30 s with a 780 nm laser at 100% power. The ultraviolet–visible (UV–Vis) spectrum of the Ag NPs was recorded with an Evolution 220 UV–Visible Spectrophotometer (Thermo Fisher Scientific) with a quartz cuvette containing 3  $\mu$ L of concentrated colloidal Ag NPs and 997  $\mu$ L ultrapure water. The scanning electron microscopy (SEM) photomicrograph of the Ag NPs was recorded with a S-4800 Field Emission Scanning Electron Microscope (Hitachi, Tokyo, Japan). X-ray photoelectron spectroscopy (XPS) data were obtained using a PHI 5000 VersaProbe instrument (ULVAC-PHI, Kanagawa, Japan). The C1s peak from adventitious carbon-based contamination was used as the reference for calibration of the binding energy. Resultant data were deconvoluted with XPSPEAK41 software. OriginPro 9.0 software (OriginLab Corporation, Northampton, MA, USA) was used for all other data analysis and plotting.

*Preparation of Silver Nanoparticles.* Ag NPs were prepared based on the popular Lee-Meisel method.<sup>64</sup> In a beaker of 500 mL of vigorously boiling ultrapure water, 0.09 g AgNO<sub>3</sub> and 10 mL of 1% w/w trisodium citrate were added, covered, and kept in the dark under magnetic stirring. After 30 min, the Ag NPs suspension was adjusted to 400 mL (due to evaporation) and left to cool to room temperature. The Ag NPs were then concentrated by centrifugation (10x, 1.0 mL aliquots). Next, three 5  $\mu$ L layers of concentrated Ag NPs were deposited onto a disposable TE100 carbon screen-printed electrode (Zensor Research & Development, Taichung, Taiwan), and allowed to dry before the next layer was added. The electrodes were used because we found that during the subsequent KCl cleaning step for citrate removal, the deposited Ag NPs would often detach from a Si wafer or glass slide, but not from the surface of the electrode. To remove citrate, the dried Ag NPs were treated with 50  $\mu$ L of 0.5 M KCl for 30 min, and then rinsed carefully with ultrapure water. Finally, 10  $\mu$ L of 1 mM 2,6-DAP solution was deposited onto the Ag NPs and allowed to dry. Our instrument setup did not permit spectroelectrochemical measurements, but this Ag NP-modified electrode can also be used for electrochemical-SERS (EC-SERS).<sup>65</sup>

*Computational Details.* Simulated Raman spectra were computed using DFT at the B3LYP level with the 6-311+G(2d,p) (C, N, O and H) and LanL2DZ (Ag) basis sets and the Gaussian 09 software package.<sup>66-70</sup> Optimised ground state structures were used to compute the Raman activities ( $S_i$ ), which were converted to relative Raman intensity ( $I_i$ ) using the GaussSum analysis tool with the following relation from the basic theory of Raman scattering.<sup>71-73</sup>

$$I_i = \frac{f(v_0 - v_i)^4 S_i}{v_i \left(1 - \exp\left(\frac{-hcv_i}{kT}\right)\right)}$$

In this equation,  $\nu_0$  is the exciting frequency ( $\text{cm}^{-1}$ );  $\nu_i$  is the vibrational wavenumber of the normal mode;  $h$ ,  $c$ , and  $k$  are the universal constants; and  $f$  is a suitably chosen common normalisation factor for all intensities. None of the simulated spectra had negative frequencies, which confirmed their geometrical optimisation. For the simulated 2,6-DAP spectra, the excitation wavelength was the experimental wavelength (780 nm), temperature was set at 24 °C, and pure Lorentzian band shapes were used with a bandwidth of  $10 \text{ cm}^{-1}$ . For adenine, melamine and 4,4'-bipyridine, the simulation wavelengths were 532, 633 and  $1064 \text{ cm}^{-1}$ , respectively. Vibrational modes were assigned by visualisation. All molecular structure images were generated with Avogadro software.<sup>74</sup>

#### SUPPLEMENTARY DATA

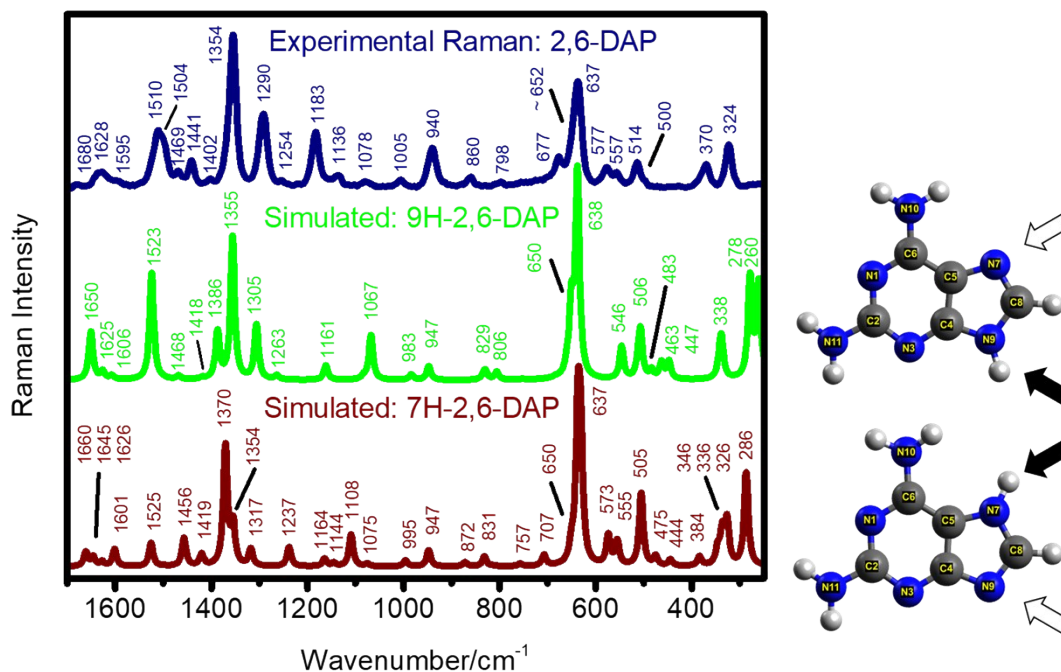

**Fig. S1. Raman spectra of 2,6-DAP.** The experimental Raman spectrum of 2,6-DAP in the solid phase (powder), consistent with previous reports,<sup>75-77</sup> is shown in comparison with the B3LYP/6-311+G(2d,p) simulated Raman spectra of the 9H-2,6-DAP and 7H-2,6-DAP tautomers.<sup>78</sup> The experimental spectrum is better modelled using the 9H-2,6-DAP tautomer. Shown also are their optimised geometries; see position of the proton on the imidazole ring indicated by the dark arrows. Their computed relative energies are 0.0 and 33.2 kJ/mol, respectively. Atomic colour scheme: blue = nitrogen (N), grey = carbon (C), white = hydrogen (H). See Tables S1 and S2 for vibrational assignments.

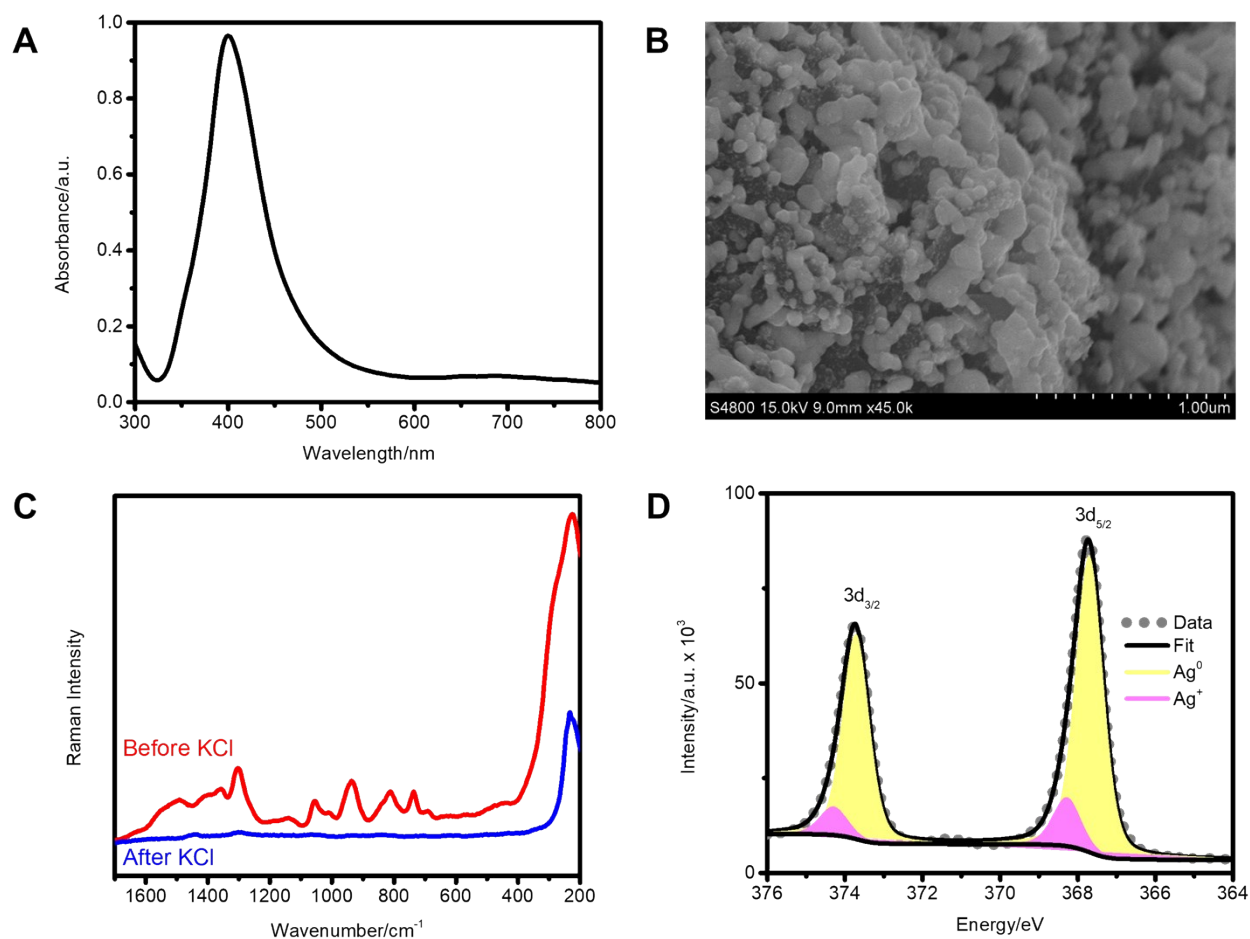

**Fig. S2. Characterisation of Ag NPs.** (A) The UV–Vis spectrum of the colloidal Ag NPs displays a maximum at 400 nm and a full width at half maximum (FWHM) of about 70 nm. (B) Scanning electron microscopy (SEM) of the deposited Ag NPs reveals a mostly spherical shape and diameters of about 50-100 nm. (C) The Raman spectrum of the dried Ag NPs displays the citrate used in their synthesis.<sup>79</sup> Treatment with 0.5 M KCl followed by rinsing with ultrapure water removed it from the spectrum, indicating displacement of the citrate ions. (D) X-ray photoelectron spectroscopy (XPS) of the treated Ag NPs is similar to other SERS-active silver surfaces,<sup>25</sup> wherein the major component is Ag (~85%) along with some Ag<sup>+</sup> (~15%) at the higher binding energy value for the oxidised form.<sup>80</sup> In summary, these are typical Ag NPs akin to those used in many other SERS studies.

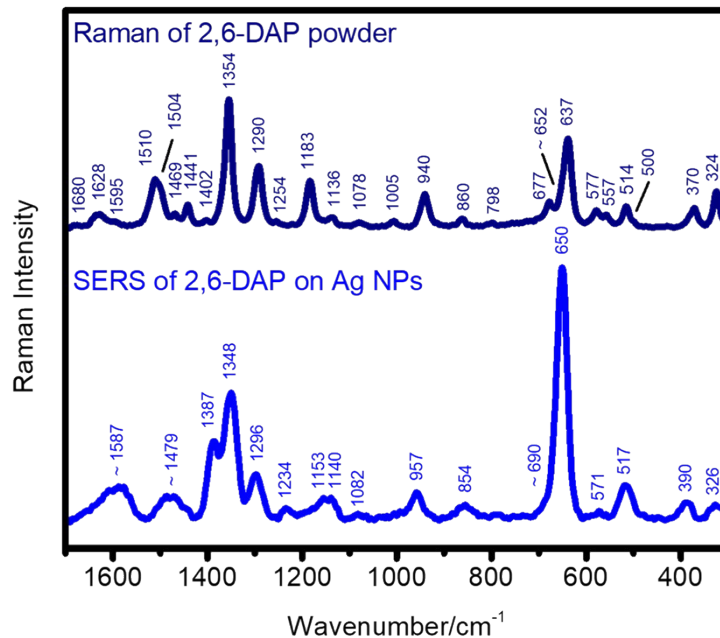

**Fig. S3. Comparison of Raman vs SERS of 2,6-DAP.** Shown again here for easier comparison are the Raman spectrum of 2,6-DAP powder and the SERS spectrum of 2,6-DAP adsorbed on Ag NPs (see Material and Methods section for more details).

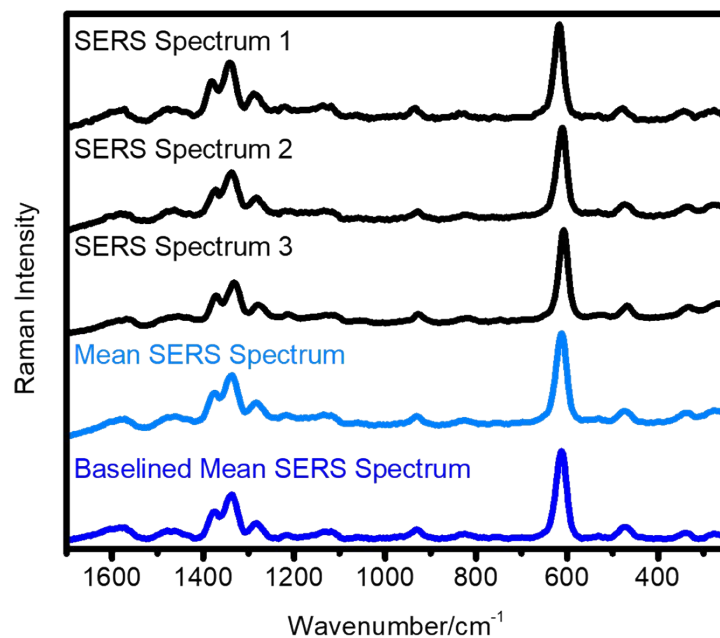

**Fig. S4. Mean and baselined SERS spectrum.** Three SERS spectra of 2,6-DAP adsorbed on Ag NPs were recorded at different locations on the sample. The mean spectrum was then baselined in OriginPro. For simplicity, it is referred to as the “SERS spectrum” throughout this article.

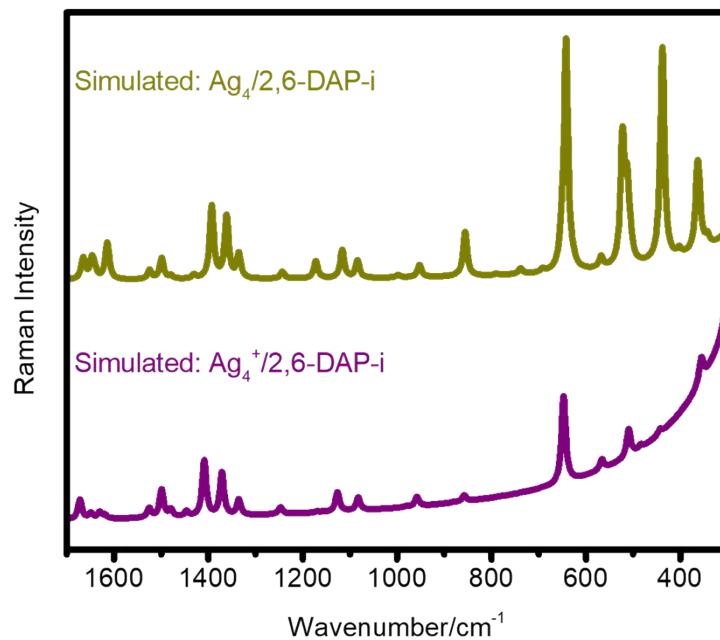

**Fig. S5. Removal of background in simulated spectra.** Simulated spectra of  $\text{Ag}_4/2,6\text{-DAP-i}$  and  $\text{Ag}_4^+/2,6\text{-DAP-i}$  before baseline correction and normalisation in OriginPro.  $\text{Ag}_4/2,6\text{-DAP-i}$  had a small background and  $\text{Ag}_4^+/2,6\text{-DAP-i}$  had a large background.

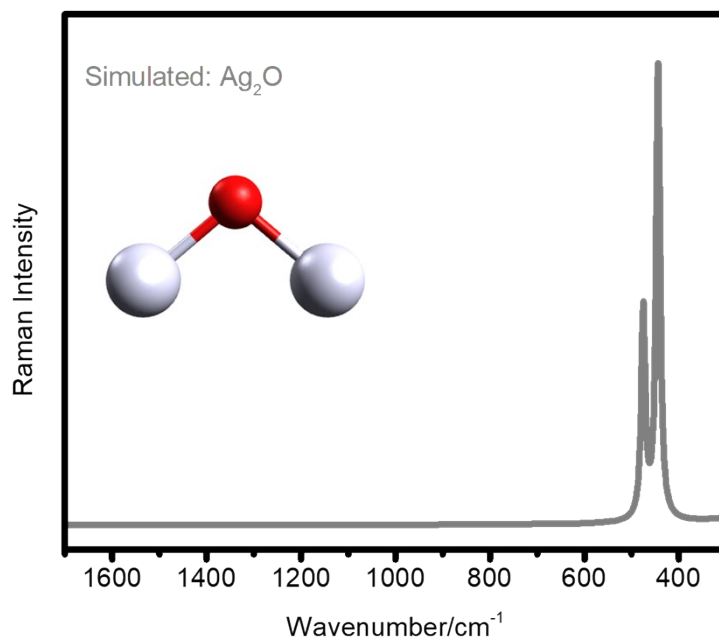

**Fig. S6. Control with no ligand on  $\text{Ag}_2\text{O}$ .** The optimised structure and simulated Raman spectrum of  $\text{Ag}_2\text{O}$ .

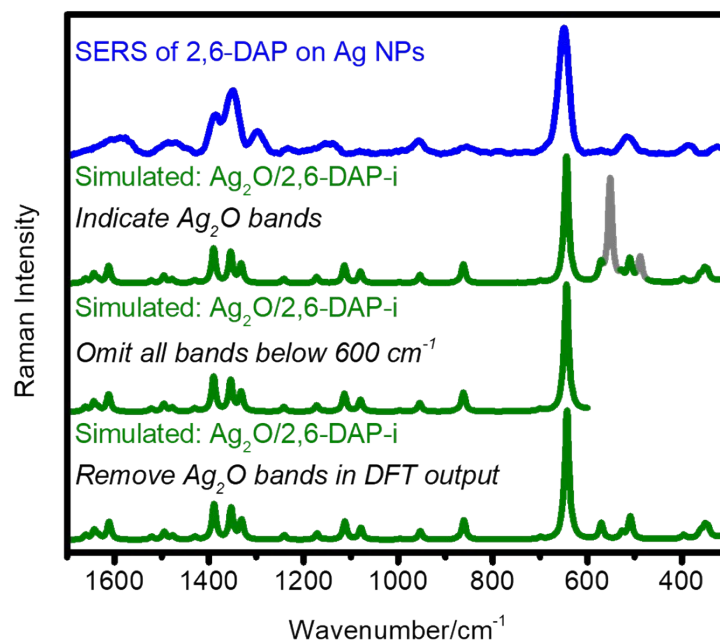

**Fig. S7. Presentation of  $\text{Ag}_2\text{O}$  bands.** There are different ways to present the simulated SERS spectrum when  $\text{Ag}_2\text{O}$  is employed as the model surface. Recall from our discussion that the two  $\text{Ag}_2\text{O}$  stretching bands in the simulated spectrum will not appear in the experimental spectrum. In Fig. 2, we presented the entire spectrum, but indicated the two  $\text{Ag}_2\text{O}$  stretching bands in a different colour (grey). Alternatively, one could simply not consider all simulated SERS bands below  $600\text{ cm}^{-1}$ . This approach is easier and does not require one to check the vibrational origins of the bands, although it could result in other useful bands not being considered. Another option for more experienced computational chemistry researchers would be to manually remove the  $\text{Ag}_2\text{O}$  vibrations (and only these!) from the DFT output file before generating the spectrum. Of course, one must clearly state that the bands have been removed manually. This approach could be employed to create a better visual comparison of the experimental and simulated spectra, although it may not be applicable if  $\text{Ag}_2\text{O}$  vibrations are coupled with other vibrations of the adsorbate.

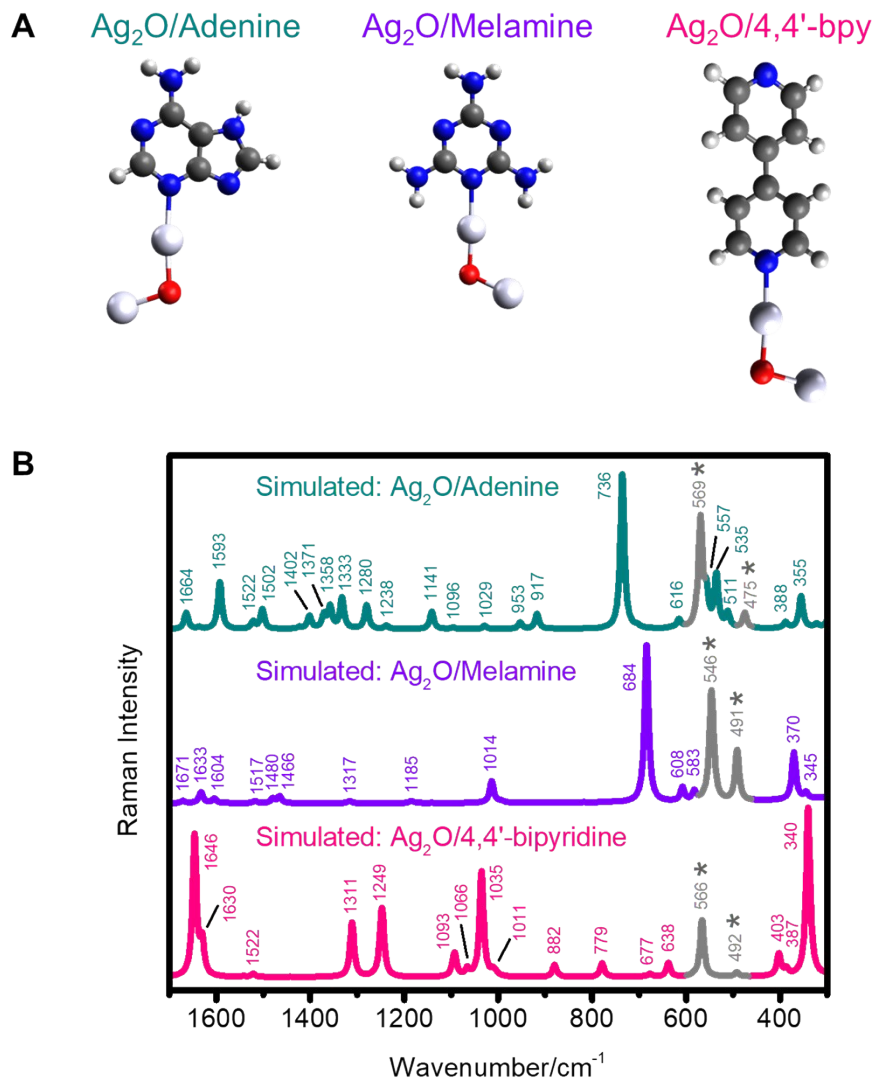

**Fig. S8. Simulating the spectra of other molecules.** (A) Optimised structures and (B) simulated SERS spectra of Ag<sub>2</sub>O/Adenine, Ag<sub>2</sub>O/Melamine and Ag<sub>2</sub>O/4,4'-bpy. Ag<sub>2</sub>O stretching vibrations are indicated with an asterisk (\*). Atomic colour scheme: blue = nitrogen (N), grey = carbon (C), red = oxygen (O), white = hydrogen (H), silver = silver (Ag). Laser wavelengths were 532, 633 and 1064 nm, respectively, as used in the cited studies. Ag<sub>2</sub>O/Adenine signal intensity was divided by 6 for easier presentation in one figure.



**Table S1.** Band assignment for 2,6-DAP Raman and SERS spectra. Experimental Raman bands are from 2,6-DAP powder. DFT Raman bands are from the 9H-2,6-DAP tautomer. SERS bands are from 2,6-DAP adsorbed on Ag NPs. DFT SERS bands are from the Ag<sub>2</sub>O/2,6-DAP-i complex. Notation for band intensity: very strong (vs), strong (s), medium (m), weak (w) and very weak (vw). Here, the vw designation is used for simulated modes of vibration not seen in the spectrum. Broad bands without a distinct maximum are indicated with (br). Shoulder (sh) bands are also indicated. Bands marked with a question mark (?) indicate uncertain assignment. R5 and R6 indicate modes of vibration for the five- or six-membered rings, respectively. The order of vibrational assignments follows their approximate contribution, as estimated by visualisation.

| Raman / cm <sup>-1</sup> | DFT Raman / cm <sup>-1</sup> | SERS / cm <sup>-1</sup> | DFT SERS / cm <sup>-1</sup> | Vibrational Assignment                                                                                             |
|--------------------------|------------------------------|-------------------------|-----------------------------|--------------------------------------------------------------------------------------------------------------------|
| 235 (m)                  | 232 (m)                      | 224 (vs, br)            | 237 (m)                     | Ring oop bend, NH <sub>2</sub> wag (N10), NH <sub>2</sub> wag (N11)                                                |
| -                        | 260 (s)                      | -                       | -                           | NH <sub>2</sub> wag (N10), ring bend                                                                               |
| -                        | -                            | -                       | 279 (vs)                    | NH <sub>2</sub> wag (N11)                                                                                          |
| 324 (s)                  | 278 (s)                      | 326 (m)                 | 294 (m)                     | NH <sub>2</sub> rock (N10), ring bend, NH <sub>2</sub> wag (N11)                                                   |
| -                        | -                            | ~332 (m, sh)            | 351 (m)                     | NH <sub>2</sub> twist (N10), N7-H oop bend, ring oop bend, NH <sub>2</sub> rock (N11)                              |
| 370 (m)                  | 338 (s)                      | 390 (m)                 | 361 (m, sh)                 | NH <sub>2</sub> rock (N11), ring bend                                                                              |
| -                        | 341 (vw)                     | -                       | 344 (vw)                    | Ring oop bend, N9-H oop bend (SERS: N7-H oop bend)                                                                 |
| 500 (w, sh)              | 447 (m)                      | -                       | -                           | NH <sub>2</sub> wag (N11)                                                                                          |
| 514 (m)                  | 463 (m)                      | 517 (m)                 | 508 (m)                     | NH <sub>2</sub> twist (N11)                                                                                        |
| -                        | 483 (w)                      | -                       | 396 (w)                     | N9-H oop bend (SERS: N7-H oop bend), NH <sub>2</sub> twist (N10), ring oop bend                                    |
| -                        | -                            | -                       | 487 (s)                     | Ag <sub>2</sub> O symmetric stretch, some R6 stretch                                                               |
| 557 (w)                  | 506 (s)                      | 517 (m)                 | 509 (s)                     | R6 stretch, some Ag <sub>2</sub> O symmetric stretch in SERS                                                       |
| -                        | 512 (vw)                     | -                       | -                           | NH <sub>2</sub> twist (N10), N9-H oop bend, NH <sub>2</sub> twist (N11), R6 stretch                                |
| -                        | -                            | -                       | 526 (w)                     | NH <sub>2</sub> wag (N10), ring bend, NH <sub>2</sub> twist (N11)                                                  |
| -                        | -                            | -                       | 550 (vs)                    | Ag <sub>2</sub> O asymmetric stretch, some ring bend                                                               |
| 577 (m)                  | 546 (m)                      | 571 (w)                 | 570 (m)                     | Ring bend, some Ag <sub>2</sub> O asymmetric stretch in SERS                                                       |
| 637 (vs)                 | 638 (vs)                     | 650 (vs)                | 643 (vs)                    | Ring bend/stretch (breathing)                                                                                      |
| 652 (m, sh)              | 650 (s, sh)                  | -                       | 651 (w, sh)                 | Ring bend, NH <sub>2</sub> rock (N10), NH <sub>2</sub> rock (N11)                                                  |
| -                        | 659 (vw)                     | -                       | 630 (vw)                    | R5 oop bend                                                                                                        |
| 677 (m)                  | 683 (vw)                     | 690 (w, sh)             | 699 (w)                     | Ring oop bend                                                                                                      |
| -                        | 752 (vw)                     | -                       | 747 (vw)                    | Ring oop bend                                                                                                      |
| 798 (w)                  | 806 (w)                      | 779 (w)                 | 804 (vw)                    | C8-H oop bend (less in SERS), ring oop bend                                                                        |
| 860 (w, ?)               | 829 (w)                      | -                       | 873 (vw)                    | C8-H oop bend, ring oop bend                                                                                       |
| 860 (w, ?)               | 833 (vw)                     | 854 (w)                 | 861 (s)                     | Ring stretch                                                                                                       |
| 940 (m)                  | 947 (m)                      | 957 (m)                 | 953 (m)                     | N7=C8-N9 stretch                                                                                                   |
| 1005 (w)                 | 983 (w)                      | -                       | 996 (w)                     | Ring stretch, NH <sub>2</sub> rock (N10), NH <sub>2</sub> rock (N11)                                               |
| 1078 (w)                 | 1067 (s)                     | 1082 (w)                | 1078 (m)                    | Ring stretch, NH <sub>2</sub> rock (N11)                                                                           |
| -                        | 1083 (vw)                    | 1140 (w)                | 1112 (s)                    | N7-C8 stretch                                                                                                      |
| 1136 (w)                 | 1160 (w)                     | 1140 (w) or 1153 (w)    | 1154 (vw)                   | R6 bend, ring stretch, NH <sub>2</sub> rock (N10) (SERS: NH <sub>2</sub> rock (N11))                               |
| 1183 (s)                 | 1161 (m)                     | 1153 (w)                | 1171 (m)                    | R6 bend, NH <sub>2</sub> rock (N10), R5 stretch, C2-N11 stretch, (SERS: NH <sub>2</sub> rock (N11))                |
| 1254 (w)                 | 1263 (w)                     | 1234 (w)                | 1240 (m)                    | C8-H bend, NH <sub>2</sub> rock (N10), N9-H bend (SERS: N7-H bend), ring stretch, NH <sub>2</sub> rock (N11)       |
| 1290 (s)                 | 1305 (s)                     | 1296 (m)                | 1330 (s)                    | Ring stretch, SERS: No movement for N7-H but has NH <sub>2</sub> rock (N10)                                        |
| 1354 (vs)                | 1355 (vs)                    | 1348 (s)                | 1352 (s)                    | Ring (asym stretch N1-C2 and C4-C5), NH <sub>2</sub> rock (N11), NH <sub>2</sub> rock (N10), N9-H bend (SERS: N7-H |

|              |               |               |              |                                                                                                                  |
|--------------|---------------|---------------|--------------|------------------------------------------------------------------------------------------------------------------|
|              |               |               |              | bend)                                                                                                            |
| 1370 (m, sh) | 1386 (s)      | 1387 (s)      | 1389 (s)     | Ring stretch, N9–H bend (SERS: N7–H bend)                                                                        |
| 1402 (w)     | 1418 (w)      | ~1479 (m, br) | 1429 (w)     | Ring stretch, C4–N9 stretch, C2–N11 stretch, (SERS: C8–N9 stretch, C6–N10 stretch)                               |
| 1441 (m)     | -             | ~1479 (m, br) | -            | Possibly ring stretch (?)                                                                                        |
| 1469 (w)     | 1468 (w)      | ~1479 (m, br) | 1476 (w)     | C2–N3–C4 bend, N7–C8 stretch (SERS: N9–C8 stretch), NH <sub>2</sub> scissor (N11), NH <sub>2</sub> scissor (N10) |
| 1504 (s, sh) | 1501 (vw, sh) | ~1479 (m, br) | 1494 (m)     | NH <sub>2</sub> scissor (N10), NH <sub>2</sub> scissor (N11), ring stretch,                                      |
| 1510 (s)     | 1523 (vs)     | ~1479 (m, br) | 1520 (w)     | N7–C8 stretch (SERS: N9–C8 stretch), ring bending, NH <sub>2</sub> scissor (N11), NH <sub>2</sub> scissor (N10)  |
| 1595 (w)     | 1606 (w)      | ~1587 (m, br) | 1610 (s)     | NH <sub>2</sub> scissor (N10), R6 stretch, includes NH <sub>2</sub> scissor (N11) in SERS                        |
| 1628 (m)     | 1625 (w)      | ~1587 (m, br) | 1633 (w, sh) | NH <sub>2</sub> scissor (N11), NH <sub>2</sub> scissor (N10), R6 stretch                                         |
| 1680 (w)     | 1650 (s)      | ~1587 (m, br) | 1642 (m)     | Ring stretch, N9–H bend, NH <sub>2</sub> rock (N10), NH <sub>2</sub> scissor (N11), SERS: No movement for N7–H.  |
| -            | 1652 (vw)     | -             | 1660 (w)     | NH <sub>2</sub> scissor (N10), NH <sub>2</sub> scissor (N11), R6 stretch                                         |
| -            | 3238          | -             | 3239         | C8-H stretch                                                                                                     |
| -            | 3589          | -             | 3559         | NH <sub>2</sub> (N11) symmetric stretch                                                                          |
| -            | 3594          | -             | 3567         | NH <sub>2</sub> (N10) symmetric stretch                                                                          |
| -            | 3651          | -             | 3656         | N9–H stretch (SERS: N7–H stretch)                                                                                |
| -            | 3709          | -             | 3709         | NH <sub>2</sub> (N11) asymmetric stretch                                                                         |
| -            | 3719          | -             | 3679         | NH <sub>2</sub> (N10) asymmetric stretch                                                                         |

**Table S2.** DFT simulated Raman bands and corresponding vibrational assignments for the 7H-2,6-DAP tautomer. Notation is the same as in Table S1.

| DFT Raman / cm <sup>-1</sup> | Vibrational Assignment                                                                  |
|------------------------------|-----------------------------------------------------------------------------------------|
| 232 (w)                      | Ring oop bend, NH <sub>2</sub> twist (N10), NH <sub>2</sub> twist (N11)                 |
| 286 (s)                      | NH <sub>2</sub> rock (N10), ring bend                                                   |
| 326 (s)                      | N7–H oop bend, ring bend, NH <sub>2</sub> twist (N10)                                   |
| 336 (s, sh)                  | NH <sub>2</sub> rock (N11), ring bend, N7–H oop bend                                    |
| 346 (m, sh)                  | NH <sub>2</sub> twist (N10), N7–H oop bend, ring oop bend                               |
| 384 (w)                      | NH <sub>2</sub> twist (N10), N7–H oop bend, ring oop bend                               |
| 444 (w)                      | NH <sub>2</sub> twist (N11)                                                             |
| 475 (w)                      | NH <sub>2</sub> wag (N11), ring bend                                                    |
| 505 (s)                      | R6 stretch, NH <sub>2</sub> wag (N11)                                                   |
| 555 (m)                      | Ring bend, NH <sub>2</sub> wag (N10), NH <sub>2</sub> twist (N11)                       |
| 573 (m)                      | NH <sub>2</sub> wag (N10), ring oop bend                                                |
| 631 (s, sh)                  | R5 oop bend, R6 stretch                                                                 |
| 637 (vs)                     | R5 oop bend, R6 stretch, NH <sub>2</sub> wag (N10)                                      |
| 650 (w, sh)                  | Ring bend, NH <sub>2</sub> rock (N10), NH <sub>2</sub> rock (N11)                       |
| 707 (w)                      | Ring oop bend, NH <sub>2</sub> wag (N10)                                                |
| 757 (w)                      | Ring oop bend                                                                           |
| 813 (vw)                     | Ring oop bend                                                                           |
| 831 (w)                      | Ring stretch                                                                            |
| 872 (w)                      | C8–H oop bend                                                                           |
| 947 (m)                      | N7–C8=N9 bend, R6 stretch                                                               |
| 995 (w)                      | NH <sub>2</sub> rock (N10), C2–N1–C6 stretch, C4–N9 stretch, NH <sub>2</sub> rock (N11) |
| 1075 (w)                     | C2–N3–C4 bend, C6–N10 stretch, N7–C8 stretch                                            |
| 1108 (m)                     | N7–C8 stretch, NH <sub>2</sub> rock (N11)                                               |
| 1144 (w)                     | NH <sub>2</sub> rock (N11), NH <sub>2</sub> rock (N10), R6 bend, R5 stretch             |
| 1164 (w)                     | NH <sub>2</sub> rock (N10), NH <sub>2</sub> rock (N11), ring stretch                    |
| 1237 (m)                     | Ring stretch, mostly C5–N7 stretch                                                      |
| 1317 (m)                     | Ring stretch, NH <sub>2</sub> rock (N10), NH <sub>2</sub> rock (N11)                    |
| 1354 (s)                     | Ring stretch, C8–H bend, NH <sub>2</sub> rock (N11)                                     |
| 1370 (vs)                    | Ring stretch, mostly C4–C5 stretch                                                      |
| 1419 (w)                     | N7–C8 stretch, C6–N10 stretch                                                           |
| 1456 (m)                     | C2–N11 stretch, N1–C6 stretch, R5 bend                                                  |
| 1497 (vw)                    | R6 asym stretch, C6–N10 stretch                                                         |
| 1525 (m)                     | C8–N9 stretch, R5 and R6 stretch                                                        |
| 1601 (m)                     | R6 stretch (mostly N1–C2, C4–C5 stretch), NH <sub>2</sub> scissor (N10)                 |

|          |                                                                                                   |
|----------|---------------------------------------------------------------------------------------------------|
| 1626 (w) | NH <sub>2</sub> scissor (N11)                                                                     |
| 1645 (w) | NH <sub>2</sub> scissor (N10)                                                                     |
| 1660 (m) | Ring stretch (mostly C5-C6 stretch), NH <sub>2</sub> scissor (N10), NH <sub>2</sub> scissor (N11) |
| 3230     | C8-H stretch                                                                                      |
| 3552     | NH <sub>2</sub> (N10) symmetric stretch                                                           |
| 3587     | NH <sub>2</sub> (N11) symmetric stretch                                                           |
| 3656     | N7-H stretch, NH <sub>2</sub> (N10) asymmetric stretch                                            |
| 3659     | NH <sub>2</sub> (N10) asymmetric stretch, N7-H stretch                                            |
| 3705     | NH <sub>2</sub> (N11) asymmetric stretch                                                          |

**Table S3.** Computed relative energies and Boltzmann distribution (*i.e.*, population) for the various Ag<sup>+</sup>/2,6-DAP complexes at 298.15 K.

| Complex                      | Relative Energy (kJ/mol) | Population (%) |
|------------------------------|--------------------------|----------------|
| Ag <sup>+</sup> /2,6-DAP-i   | 0.0                      | 99.99          |
| Ag <sup>+</sup> /2,6-DAP-ii  | 13.1                     | 0.01           |
| Ag <sup>+</sup> /2,6-DAP-iii | 23.7                     | 0.00           |
| Ag <sup>+</sup> /2,6-DAP-iv  | 24.1                     | 0.00           |
| Ag <sup>+</sup> /2,6-DAP-v   | 36.4                     | 0.00           |
| Ag <sup>+</sup> /2,6-DAP-vi  | 58.5                     | 0.00           |
| Ag <sup>+</sup> /2,6-DAP-vii | 75.0                     | 0.00           |

**Table S4.** Computed Ag–N bond lengths for the various complexes.

| Complex                                 | Ag–N bond length (Å)            |
|-----------------------------------------|---------------------------------|
| Ag <sup>+</sup> /2,6-DAP-i              | Ag–N3 = 2.369<br>Ag–N9 = 2.478  |
| Ag <sup>+</sup> /2,6-DAP-ii             | Ag–N7 = 2.310<br>Ag–N10 = 2.421 |
| Ag <sup>+</sup> /2,6-DAP-iii            | Ag–N1 = 2.351<br>Ag–N11 = 2.417 |
| Ag <sup>+</sup> /2,6-DAP-iv             | Ag–N1 = 2.334<br>Ag–N10 = 2.500 |
| Ag <sup>+</sup> /2,6-DAP-v              | Ag–N3 = 2.379<br>Ag–N11 = 2.395 |
| Ag <sup>+</sup> /2,6-DAP-vi             | Ag–N1 = 2.380<br>Ag–N11 = 2.386 |
| Ag <sup>+</sup> /2,6-DAP-vii            | Ag–N1 = 2.309<br>Ag–N10 = 2.517 |
| Ag/2,6-DAP-i                            | Ag–N3 = 2.529                   |
| Ag <sub>4</sub> <sup>+</sup> /2,6-DAP-i | Ag–N3 = 2.218                   |
| Ag <sub>4</sub> /2,6-DAP-i              | Ag–N3 = 2.273                   |
| Ag <sub>2</sub> O/2,6-DAP-i             | Ag–N3 = 2.163                   |
| Ag <sub>2</sub> O/Adenine               | Ag–N = 2.163                    |
| Ag <sub>2</sub> O/Melamine              | Ag–N = 2.163                    |
| Ag <sub>2</sub> O/4,4'-bpy              | Ag–N = 2.158                    |

**Table S5.** Comparison of methods to simulate SERS of 2,6-diaminopurine on Ag NPs. Here, the wavenumber (cm<sup>-1</sup>) and relative intensity (%; normalised from 0 to 100 with the most intense band at 650 cm<sup>-1</sup>) are compared. Wavenumber is shown first, followed by relative intensity in parentheses. Experimental SERS is from this study. For simulated SERS, we compared the Ag<sup>+</sup>/2,6-DAP-i, Ag/2,6-DAP-i, Ag<sub>4</sub><sup>+</sup>/2,6-DAP-i, Ag<sub>4</sub>/2,6-DAP-i, and Ag<sub>2</sub>O/2,6-DAP-i complexes. The differences between the experimental and simulated values were used to determine the mean absolute error (MAE) by the formula given below the table.

| Experimental | Ag <sup>+</sup> /2,6-DAP-i | Error          | Ag/2,6-DAP-i | Error         | Ag <sub>4</sub> <sup>+</sup> /2,6-DAP-i | Error         | Ag <sub>4</sub> /2,6-DAP-i | Error        | Ag <sub>2</sub> O/2,6-DAP-i | Error        |
|--------------|----------------------------|----------------|--------------|---------------|-----------------------------------------|---------------|----------------------------|--------------|-----------------------------|--------------|
| 517 (14)*    | 508 (39)                   | 9 (25)         | 505 (20)     | 12 (6)        | 508 (25)                                | 9 (11)        | 512 (30)                   | 5 (16)       | 509 (13)                    | 8 (1)        |
| 571 (3)      | 567 (6)                    | 4 (3)          | 560 (8)      | 11 (5)        | 565 (12)                                | 6 (9)         | 566 (5)                    | 5 (2)        | 570 (13)                    | 1 (10)       |
| 650 (100)    | 650 (100)                  | 0 (0)          | 639 (100)    | 11 (0)        | 646 (100)                               | 4 (0)         | 641 (100)                  | 9 (0)        | 643 (100)                   | 7 (0)        |
| 854 (6)      | 842 (1)                    | 12 (5)         | 839 (17)     | 15 (11)       | 856 (7)                                 | 2 (1)         | 854 (19)                   | 0 (13)       | 861 (15)                    | 7 (9)        |
| 957 (11)     | 961 (1)                    | 4 (10)         | 950 (6)      | 7 (5)         | 956 (11)                                | 1 (0)         | 951 (5)                    | 6 (6)        | 953 (7)                     | 4 (4)        |
| 1082 (2)     | 1071 (3)                   | 11 (1)         | 1077 (3)     | 5 (1)         | 1081 (15)                               | 1 (13)        | 1082 (8)                   | 0 (6)        | 1078 (9)                    | 4 (7)        |
| 1234 (4)     | 1238 (7)                   | 4 (3)          | 1238 (6)     | 4 (2)         | 1245 (8)                                | 11 (4)        | 1242 (3)                   | 8 (1)        | 1240 (4)                    | 6 (0)        |
| 1296 (18)    | 1325 (8)                   | 29 (10)        | 1323 (7)     | 27 (11)       | 1334 (19)                               | 38 (1)        | 1334 (11)                  | 38 (7)       | 1330 (15)                   | 34 (3)       |
| 1348 (50)    | 1359 (10)                  | 11 (40)        | 1354 (14)    | 6 (36)        | 1370 (52)                               | 22 (2)        | 1359 (27)                  | 11 (23)      | 1352 (25)                   | 4 (25)       |
| 1387 (31)    | 1411 (50)                  | 24 (19)        | 1377 (42)    | 10 (11)       | 1407 (67)                               | 20 (36)       | 1391 (32)                  | 4 (1)        | 1389 (28)                   | 2 (3)        |
| <b>MAE</b>   |                            | <b>11 (12)</b> |              | <b>11 (9)</b> |                                         | <b>11 (8)</b> |                            | <b>9 (8)</b> |                             | <b>8 (6)</b> |

\* Format: wavenumber in cm<sup>-1</sup> (relative intensity in %)

$$\text{MAE} = \frac{1}{n} \sum_{i=1}^n |x_i - y_i|$$

, where x = SERS wavenumber (or intensity), y = DFT wavenumber (or intensity), n = the number of vibrations.

Note that values are shown here as integers, but no rounding was used in the calculation until the final MAE value.

**Table S6.** Comparison of methods to simulate SERS of adenine on silver. Here, only wavenumber ( $\text{cm}^{-1}$ ) was compared because we did not have the exact band intensities from other studies. We selected bands that were clearly observed across several studies. Experimental SERS wavenumbers for this comparison were the mean values of seven samples obtained in four studies.<sup>27, 49, 81, 82</sup> For simulated SERS, we compared the  $\text{Ag}_4^+$ /Adenine complex from the work of Huang *et al.*<sup>27</sup> and our  $\text{Ag}_2\text{O}$ /Adenine complex.

| SERS (ref <sup>27</sup> ) | SERS (ref <sup>49</sup> ) | SERS (ref <sup>49</sup> ) | SERS (ref <sup>49</sup> ) | SERS (ref <sup>81</sup> ) | SERS (ref <sup>81</sup> ) | SERS (ref <sup>82</sup> ) | SERS Mean  | $\text{Ag}_4^+$ /Adenine (ref <sup>27</sup> ) | Error     | $\text{Ag}_2\text{O}$ /Adenine (This study) | Error    |
|---------------------------|---------------------------|---------------------------|---------------------------|---------------------------|---------------------------|---------------------------|------------|-----------------------------------------------|-----------|---------------------------------------------|----------|
| 624                       | 626                       | 621                       | 624                       | 631                       | 626                       | 619                       | 624        | 608                                           | 16        | 616                                         | 8        |
| 732                       | 733                       | 731                       | 732                       | 734                       | 734                       | 730                       | 732        | 721                                           | 11        | 736                                         | 4        |
| 958                       | 961                       | 958                       | 954                       | 960                       | 960                       | 958                       | 958        | 956                                           | 2         | 953                                         | 5        |
| 1013                      | 1025                      | 1029                      | 999                       | 1026                      | 1026                      | 1030                      | 1021       | 994                                           | 27        | 1029                                        | 8        |
| 1113                      | 1137                      | 1117                      | 1094                      | 1136                      | 1135                      | 1119                      | 1122       | 1106                                          | 16        | 1096                                        | 26       |
| 1246                      | 1244                      | 1245                      | 1244                      | 1249                      | 1251                      | 1249                      | 1247       | 1252                                          | 5         | 1238                                        | 9        |
| 1330                      | 1336                      | 1326                      | 1330                      | 1332                      | 1329                      | 1327                      | 1330       | 1337                                          | 7         | 1333                                        | 3        |
| 1401                      | 1397                      | 1399                      | 1397                      | 1397                      | 1398                      | 1396                      | 1398       | 1391                                          | 7         | 1402                                        | 4        |
| 1515                      | 1513                      | 1516                      | n/a                       | n/a                       | n/a                       | 1517                      | 1515       | 1513                                          | 2         | 1522                                        | 7        |
| 1572                      | n/a                       | 1568                      | 1586                      | n/a                       | n/a                       | 1568                      | 1574       | 1578                                          | 4         | 1593                                        | 19       |
|                           |                           |                           |                           |                           |                           |                           | <b>MAE</b> |                                               | <b>10</b> |                                             | <b>9</b> |

Upon comparing the  $\text{Ag}_4^+$ /Adenine and  $\text{Ag}_2\text{O}$ /Adenine complexes, we see that as determined by the MAE, the latter provides a close but somewhat more accurate simulation of SERS. Notably, the intense ring breathing band, observed experimentally at  $732 \text{ cm}^{-1}$ , is more accurately simulated by  $\text{Ag}_2\text{O}$ /Adenine. We also noted that  $\text{Ag}_4^+$ /Adenine has one band at  $1363 \text{ cm}^{-1}$ , while our  $\text{Ag}_2\text{O}$ /Adenine simulated two bands at  $1358$  and  $1371 \text{ cm}^{-1}$ . Experimentally, the  $1371 \text{ cm}^{-1}$  has been observed, but not the  $1358 \text{ cm}^{-1}$  band.<sup>49, 81</sup> However, since some bands in this region are somewhat broad in SERS, it remains unclear whether the  $1358 \text{ cm}^{-1}$  band from  $\text{Ag}_2\text{O}$ /Adenine is simply a bad simulation, or if experimentally it is obscured by one of the more intense and broader bands. Also, Huang *et al.* observed a band at  $1650 \text{ cm}^{-1}$ ,<sup>27</sup> which was better simulated by their  $\text{Ag}_4^+$ /Adenine at  $1652 \text{ cm}^{-1}$  than by our  $\text{Ag}_2\text{O}$ /Adenine at  $1664 \text{ cm}^{-1}$ , but this band was not reported in the other studies,<sup>49, 81, 82</sup> so we omitted it from the comparison. In general, the bands above  $1500 \text{ cm}^{-1}$  were too intense with both methods. Note that the intensity of some bands changes for different silver surfaces, such as the band around  $1330 \text{ cm}^{-1}$ .<sup>49</sup> Note also that the choice of DFT method could affect the results too, which we did not consider.

**Table S7.** Comparison of methods to simulate SERS of melamine on silver. Here, only wavenumber ( $\text{cm}^{-1}$ ) was compared because we did not have the exact band intensities from other studies. We selected bands that were clearly observed across several studies. Experimental SERS wavenumbers for this comparison were the mean values of three studies.<sup>28, 83, 84</sup> For simulated SERS, we compared the  $\text{Ag}_4/\text{Melamine}$  complex from the work of An *et al.*<sup>28</sup> and our  $\text{Ag}_2\text{O}/\text{Melamine}$  complex.

| SERS (ref <sup>28</sup> ) | SERS (ref <sup>83</sup> ) | SERS (ref <sup>84</sup> ) | SERS (Mean) | $\text{Ag}_4/\text{Melamine}$ (ref <sup>28</sup> ) | Error     | $\text{Ag}_2\text{O}/\text{Melamine}$ (This study) | Error     |
|---------------------------|---------------------------|---------------------------|-------------|----------------------------------------------------|-----------|----------------------------------------------------|-----------|
| 382                       | 387                       | 387                       | 385         | 373                                                | 12        | 370                                                | 15        |
| 573                       | 573                       | 575                       | 574         | 571                                                | 3         | 583                                                | 9         |
| 684                       | 680                       | 686                       | 683         | 688                                                | 5         | 684                                                | 1         |
| 980                       | 976                       | 979                       | 978         | 1003                                               | 25        | 1014                                               | 36        |
| 1185                      | n/a                       | n/a                       | 1185        | 1165                                               | 20        | 1185                                               | 0         |
| 1494                      | n/a                       | 1497                      | 1496        | 1489                                               | 7         | 1480                                               | 16        |
| 1554                      | n/a                       | 1553                      | 1554        | 1543                                               | 11        | 1517                                               | 37        |
| 1610                      | n/a                       | 1603                      | 1607        | 1624                                               | 17        | 1604                                               | 3         |
| 1690                      | n/a                       | 1692                      | 1691        | 1669                                               | 22        | 1671                                               | 20        |
|                           |                           |                           | <b>MAE</b>  |                                                    | <b>14</b> |                                                    | <b>15</b> |

Compared to our  $\text{Ag}_2\text{O}/\text{Melamine}$  complex, the  $\text{Ag}_4/\text{Melamine}$  complex provides a slightly better simulation of the wavenumber of the bands in SERS, as determined by the MAE. However, we note that an experimental SERS band<sup>28</sup> at  $1349 \text{ cm}^{-1}$  was simulated at  $1317 \text{ cm}^{-1}$  by  $\text{Ag}_2\text{O}/\text{Melamine}$ , but not at all by  $\text{Ag}_4/\text{Melamine}$ . On the other hand,  $\text{Ag}_2\text{O}/\text{Melamine}$  has an extra band at  $1633 \text{ cm}^{-1}$  that was not reported experimentally in the three studies considered. We further observed, however, that for relative band intensity,  $\text{Ag}_2\text{O}/\text{Melamine}$  is obviously much better than  $\text{Ag}_4/\text{Melamine}$  (see our Fig. S8 *versus* in ref<sup>28</sup> Fig. 2B and Fig. 6). Finally, we note that another study has used  $\text{Ag}/\text{Melamine}$  and  $\text{Ag}^+/\text{Melamine}$  to simulate SERS, but the bands therein were not labelled, so we could not compare the results.<sup>85</sup>

**Table S8.** Comparison of methods to simulate SERS of 4,4'-bipyridine on silver. Here, only wavenumber ( $\text{cm}^{-1}$ ) was compared because we did not have the exact band intensities from other studies. We selected bands that were clearly observed across several studies. Experimental SERS wavenumbers for this comparison were the mean values of three studies.<sup>26, 86, 87</sup> For simulated SERS, we compared the Ag/4,4'-bpy, Ag<sub>3</sub>/4,4'-bpy and Ag<sub>4</sub>/4,4'-bpy complexes from the work of Zhuang *et al.*<sup>26</sup> and our Ag<sub>2</sub>O/4,4'-bpy complex.

| SERS (ref <sup>26</sup> ) | SERS (ref <sup>86</sup> ) | SERS (ref <sup>87</sup> ) | SERS (Mean) | Ag/4,4'-bpy (ref <sup>26</sup> ) | Error     | Ag <sub>3</sub> /4,4'-bpy (ref <sup>26</sup> ) | Error     | Ag <sub>4</sub> /4,4'-bpy (ref <sup>26</sup> ) | Error     | Ag <sub>2</sub> O/4,4'-bpy (This study) | Error     |
|---------------------------|---------------------------|---------------------------|-------------|----------------------------------|-----------|------------------------------------------------|-----------|------------------------------------------------|-----------|-----------------------------------------|-----------|
| 768                       | 770                       | 770                       | 769         | 768                              | 1         | 770                                            | 1         | 769                                            | 0         | 779                                     | 10        |
| 874                       | n/a                       | n/a                       | 874         | 887                              | 13        | 881                                            | 7         | 886                                            | 12        | 882                                     | 8         |
| 1015                      | 1018                      | 1014                      | 1016        | 1019                             | 3         | 1020                                           | 4         | 1021                                           | 5         | 1035                                    | 19        |
| 1078                      | 1076                      | n/a                       | 1077        | 1098                             | 21        | 1090                                           | 13        | 1098                                           | 21        | 1093                                    | 16        |
| 1234                      | 1232                      | 1234                      | 1233        | 1250                             | 17        | 1240                                           | 7         | 1250                                           | 17        | 1249                                    | 16        |
| 1293                      | 1294                      | 1296                      | 1294        | 1316                             | 22        | 1316                                           | 22        | 1316                                           | 22        | 1311                                    | 17        |
| 1514                      | 1514                      | n/a                       | 1514        | 1543                             | 29        | 1543                                           | 29        | 1543                                           | 29        | 1522                                    | 8         |
| 1609                      | 1611                      | 1610                      | 1610        | 1649                             | 39        | 1627                                           | 17        | 1650                                           | 40        | 1646                                    | 36        |
|                           |                           |                           |             |                                  |           |                                                |           |                                                |           |                                         |           |
|                           |                           |                           | <b>MAE</b>  |                                  | <b>18</b> |                                                | <b>13</b> |                                                | <b>18</b> |                                         | <b>16</b> |

Overall, none of the four methods stands out for simulation of SERS of 4,4'-bipyridine on Ag. For wavenumber of the bands, as determined by the MAE, we see here that Ag<sub>3</sub>/4,4'-bpy is the most accurate, followed by Ag<sub>2</sub>O/4,4'-bpy, while Ag/4,4'-bpy and Ag<sub>4</sub>/4,4'-bpy are the least accurate. However, despite the fact that we did not do a quantitative comparison of the relative intensity of the bands, it is obvious that Ag/4,4'-bpy and Ag<sub>4</sub>/4,4'-bpy are the most accurate in this regard, while Ag<sub>3</sub>/4,4'-bpy and Ag<sub>2</sub>O/4,4'-bpy are less accurate (see our Fig. S8 versus in ref<sup>26</sup> Fig. 3). In summary, none of these methods is the clear winner, although all of the simulations are acceptable.

## SUPPLEMENTARY REFERENCES

64. P. C. Lee and D. Meisel, *J. Phys. Chem.*, 1982, **86**, 3391-3395.
65. S. G. Harroun, T. J. Abraham, C. Prudhoe, Y. Zhang, P. J. Scammells, C. L. Brosseau, C. C. Pye and R. D. Singer, *Phys. Chem. Chem. Phys.*, 2013, **15**, 19205-19212.
66. W. Kohn and L. J. Sham, *Phys. Rev.*, 1965, **140**, A1133.
67. A. D. Becke, *J. Chem. Phys.*, 1993, **98**, 5648-5652.
68. C. Lee, W. Yang and R. G. Parr, *Phys. Rev. B*, 1988, **37**, 785-789.
69. P. J. Hay and W. R. Wadt, *J. Chem. Phys.*, 1985, **82**, 299-310.
70. M. J. Frisch, G. W. Trucks, H. B. Schlegel, G. E. Scuseria, M. A. Robb, J. R. Cheeseman, G. Scalmani, V. Barone, G. A. Petersson, H. Nakatsuji, X. Li, M. Caricato, A. V. Marenich, J. Bloino, B. G. Janesko, R. Gomperts, B. Mennucci, H. P. Hratchian, J. V. Ortiz, A. F. Izmaylov, J. L. Sonnenberg, Williams, F. Ding, F. Lipparini, F. Egidi, J. Goings, B. Peng, A. Petrone, T. Henderson, D. Ranasinghe, V. G. Zakrzewski, J. Gao, N. Rega, G. Zheng, W. Liang, M. Hada, M. Ehara, K. Toyota, R. Fukuda, J. Hasegawa, M. Ishida, T. Nakajima, Y. Honda, O. Kitao, H. Nakai, T. Vreven, K. Throssell, J. A. Montgomery Jr., J. E. Peralta, F. Ogliaro, M. J. Bearpark, J. J. Heyd, E. N. Brothers, K. N. Kudin, V. N. Staroverov, T. A. Keith, R. Kobayashi, J. Normand, K. Raghavachari, A. P. Rendell, J. C. Burant, S. S. Iyengar, J. Tomasi, M. Cossi, J. M. Millam, M. Klene, C. Adamo, R. Cammi, J. W. Ochterski, R. L. Martin, K. Morokuma, O. Farkas, J. B. Foresman and D. J. Fox, *Gaussian 09 Rev. A.1*, 2009.
71. N. M. O'Boyle, A. L. Tenderholt and K. M. Langner, *J. Comput. Chem.*, 2008, **29**, 839-845.
72. P. L. Polavarapu, *J. Phys. Chem.*, 1990, **94**, 8106-8112.
73. G. Keresztury, S. Holly, G. Besenyey, J. Varga, A. Wang and J. R. Durig, *Spectrochim. Acta A*, 1993, **49**, 2007-2026.
74. M. D. Hanwell, D. E. Curtis, D. C. Lonie, T. Vandermeersch, E. Zurek and G. R. Hutchison, *J. Cheminform.*, 2012, **4**, 17.
75. J. Florian, P. Mojzes and J. Stepanek, *J. Phys. Chem.*, 1992, **96**, 9278-9282.
76. Z. Dhaouadi, M. Ghomi, P. Mojzes, P. Y. Turpin and L. Chinsky, *Eur. Biophys. J.*, 1994, **23**, 95-104.
77. V. Krishnakumar and R. Ramasamy, *Spectrochim. Acta A*, 2008, **69**, 8-17.
78. Z. Gengeliczki, M. P. Callahan, N. Svadlenak, C. I. Pongor, B. Sztaray, L. Meerts, D. Nachtigallova, P. Hobza, M. Barbatti, H. Lischka and M. S. de Vries, *Phys. Chem. Chem. Phys.*, 2010, **12**, 5375-5388.
79. M. Kerker, O. Siiman, L. A. Bumm and D. S. Wang, *Appl. Opt.*, 1980, **19**, 3253-3255.
80. NIST X-ray Photoelectron Spectroscopy Database, National Institute of Standards and Technology. <https://srdata.nist.gov/xps/>
81. F. Madzharova, Z. Heiner, M. Gühlke and J. Kneipp, *J. Phys. Chem. C*, 2016, **120**, 15415-15423.
82. X. F. Lang, P. G. Yin, T. T. You, L. Jiang and L. Guo, *ChemPhysChem*, 2011, **12**, 2468-2475.
83. L. Li, S. Yang, J. Duan, L. Huang and G. Xiao, *Spectrochim. Acta A*, 2020, **225**, 117598.
84. N. E. Mircescu, M. Oltean, V. Chiş and N. Leopold, *Vib. Spectrosc.*, 2012, **62**, 165-171.
85. X. Chen, Y. Hu, J. Gao, Y. Zhang and S. Li, *Appl. Spectrosc.*, 2013, **67**, 491-497.
86. A. M. Robinson, L. Zhao, M. Y. S. Alam, P. Bhandari, S. G. Harroun, D. Dendukuri, J. Blackburn and C. L. Brosseau, *Analyst*, 2015, **140**, 779-785.
87. M. Muniz-Miranda, *J. Raman Spectrosc.*, 1996, **27**, 435-437.
